# Supplementary material
Source: PubMed Central journal article supplement (PMC3644634)

American Journal of Human Genetics, Volume 92

## **Supplemental Information**

### **Mutations in *SCO2* Are Associated**

### **with Autosomal-Dominant High-Grade Myopia**

**Khanh-Nhat Tran-Viet, Caldwell Powell, Veluchamy A. Barathi, Thomas Klemm, Sebastian Maurer-Stroh, Vincent Soler, Candice Ho, Tammy Yanovitch, Georg Schneider, Yi-Ju Li, Erica Nading, Ravikanth Metlapally, Seang-Mei Saw, Liang Goh, Steve Rozen, and Terri L. Young**

### **Supplemental Inventory**

Supplement S1

Supplement S2

Supplement S3

Supplement S4

Supplement S5

Supplement S6

Supplement S7

## Supplement 1. Summary of Exome Sequencing

Detailed summary table of four individuals who underwent exome sequencing. Last column (average) depicts average values across all four individuals.

| Exome Capture                                 | Affected | Affected | Unaffected | Unaffected | Average  |
|-----------------------------------------------|----------|----------|------------|------------|----------|
| Individual                                    | III:2    | IV:1     | IV:2       | III:1      |          |
| All SNVs                                      | 252470   | 260113   | 222535     | 243168     | 244571.5 |
| SNVs in dbSNP132                              | 48865    | 49219    | 44678      | 45038      | 46950    |
| Synonymous variant calls                      | 1795     | 1807     | 1897       | 1849       | 1837     |
| Nonsynonymous and canonical splice site calls | 1864     | 1828     | 1979       | 1914       | 1896.25  |
| Microindels                                   | 234      | 133      | 249        | 600        | 304      |

| Coverage Analysis                                  | Affected  | Affected  | Unaffected | Unaffected | Average    |
|----------------------------------------------------|-----------|-----------|------------|------------|------------|
| Total exonic targeted positions (bp)               | 37804019  | 37804019  | 37804019   | 37804019   | 37804019   |
| In-target base pair calls (bp)                     | 36216731  | 36292911  | 36310324   | 35878150   | 36174529   |
| Off-target base pair calls (bp)                    | 202846369 | 206534350 | 204202633  | 163279005  | 194215589  |
| Total base pair calls in all reads (bp)            | 239063100 | 242827261 | 240512957  | 199157155  | 230390118  |
| Proportion of target covered                       | 95.80%    | 96.00%    | 96.00%     | 94.90%     | 95.6%      |
|                                                    |           |           |            |            |            |
| Total number of reads                              | 23974834  | 24379907  | 21398893   | 23037982   | 23197904   |
| Total number of reads overlapping target positions | 16368831  | 16840346  | 14790170   | 16465811   | 16116289.5 |
| Proportion of reads overlapping target             | 68.00%    | 69.00%    | 69.00%     | 71.00%     | 69.25%     |
|                                                    |           |           |            |            |            |
| Maximum depth                                      | 1760      | 2014      | 3258       | 4117       | 2787.25    |
| Median depth                                       | 23        | 26        | 22         | 22         | 23.25      |
| Coverage 1X                                        | 95.80%    | 96.00%    | 94.90%     | 96.00%     | 95.6%      |
| Coverage 5X                                        | 88.00%    | 90.00%    | 84.00%     | 88.00%     | 87.5%      |
| Coverage 10X                                       | 76.00%    | 80.00%    | 71.00%     | 76.00%     | 75.7%      |
| Coverage 20X                                       | 54.00%    | 60.00%    | 51.00%     | 52.00%     | 54.2%      |

| <b>Micro-Insertion/Deletion</b>                              | <b>Affected</b> | <b>Affected</b> | <b>Unaffected</b> | <b>Unaffected</b> | <b>Average</b> |
|--------------------------------------------------------------|-----------------|-----------------|-------------------|-------------------|----------------|
| Total microindels                                            | 3365            | 3424            | 2971              | 4312              | 3518           |
| Seen by a too low proportion of reads                        | 37              | 31              | 61                | 86                | 53.75          |
| In reads with low average mapping quality                    | 69              | 76              | 63                | 85                | 73.25          |
| In reads with low average base quality in/around indel (<10) | 37              | 66              | 75                | 71                | 62.25          |
| In reads with high average mismatch count                    | 788             | 772             | 610               | 937               | 776.75         |
| In region with high mismatch rate (>0.2)                     | 38              | 24              | 37                | 116               | 53.75          |
| Outside exon/coding sequence/miRNA/UCRs                      | 2001            | 2145            | 1722              | 2252              | 2030           |
| In dbSNP132                                                  | 166             | 185             | 161               | 172               | 171            |

## Supplement 2. Structural Modeling of p.Glu140Lys Mutation

Modeling structure of SCO2 where removal of a salt-bridge between Glu140 and Lys143 which can affect stabilization of the protein. Green represents wild-type, red represents mutant conformation. Yellow represents hydrogen bond along the helix backbone.

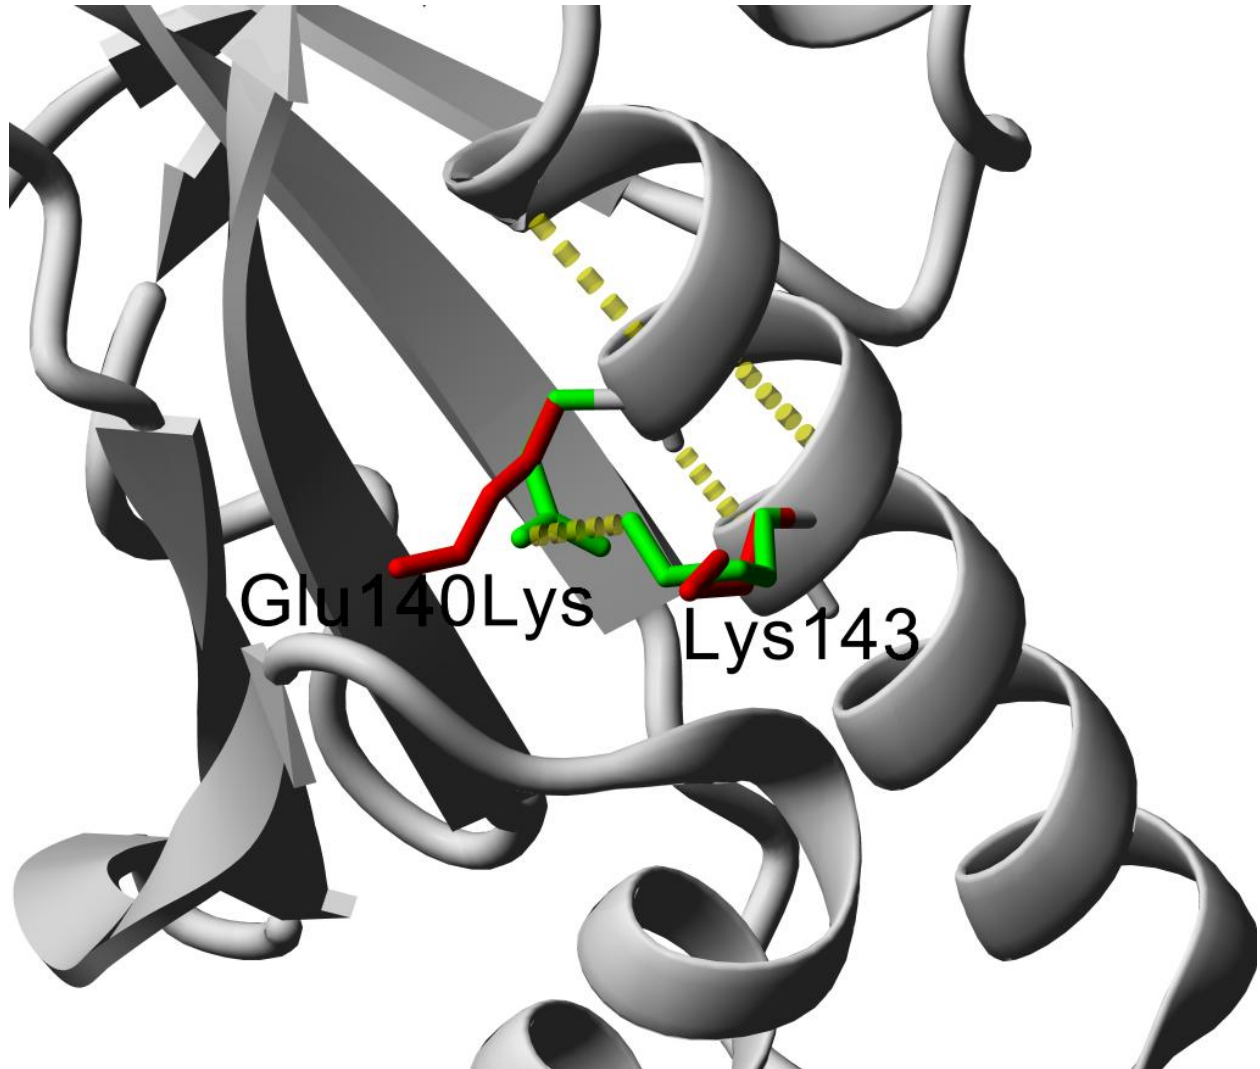

### Supplement 3. Structure of SCO2 Depicting p.Gly140Lys Mutation Copper Binding Site

Electrostatic surface potential in the SCO2 structure for wildtype and mutant proteins was calculated with the Particle Mesh Ewald method implemented in YASARA. Blue indicates positive and red indicates negative charge potential. All protein structure Figures were created with YASARA. Figure depicts inversion of charge close to the copper ion which diminishes copper binding efficiency via negative electrostatic potential of the ion binding site.

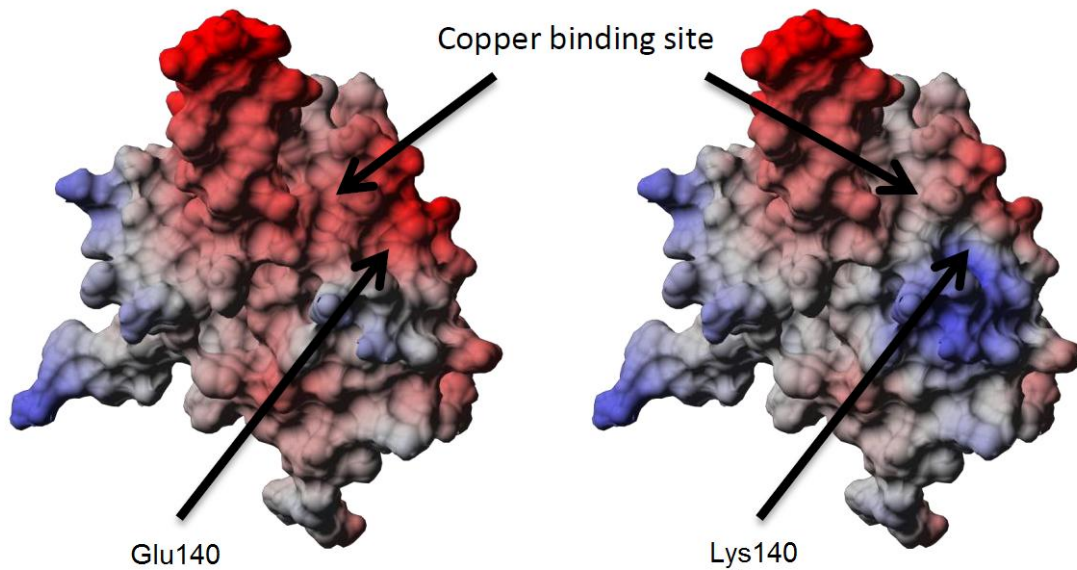

#### Supplement 4. FoldX Energy Calculation of Mutations Identified in High Myopia Patients for SCO2

A quantitative estimation of the importance of the interactions contributing to the stability of proteins and protein complexes for mutations identified on SCO2. Positive values predicts destabilization of protein. For the structural stability analysis we first minimized chain A of PDB entry 2rli using the RepairPDB function of FoldX in YASARA. The free energy change for each missense mutation was then calculated with FoldX using the average of 5 repeated runs.

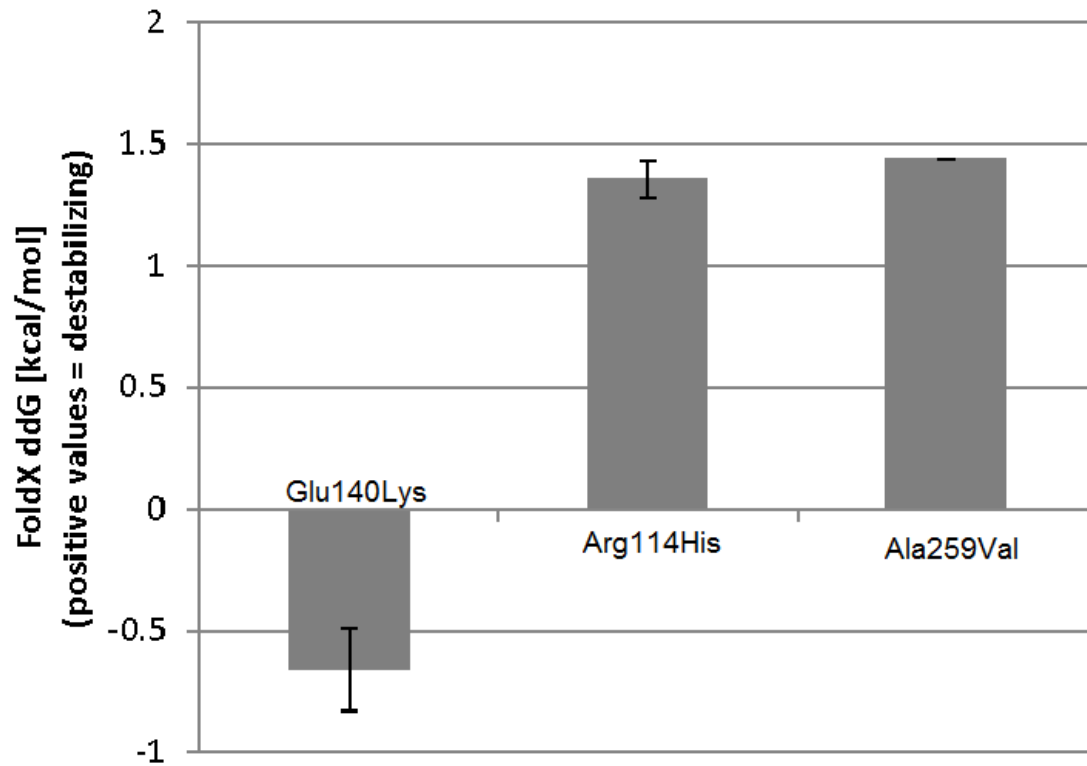

## Supplement 5. SCO1 and SCO2 Homology, Conservation, and Location Of Mutations Identified within the Protein Sequence

A phylogenetic tree with MEGA5 using the Maximum Likelihood method based on the JTT matrix-based model. A discrete Gamma distribution was used to model evolutionary rate differences among sites (5 categories (+G, parameter = 1.9464)). The rate variation model allowed for some sites to be evolutionarily invariable ([+I], 17.7% sites). The tree is drawn to scale, with branch lengths measured in the number of substitutions per site.

From the list of orthologues and paralogues identified with BLASTP against NCBI's nr database using our orthologue search protocol, we selected representative protein reference sequences from key model organisms and created a multiple alignment using MAFFT with L-INS-I parameter settings und curated and displayed the alignment in Jalview.

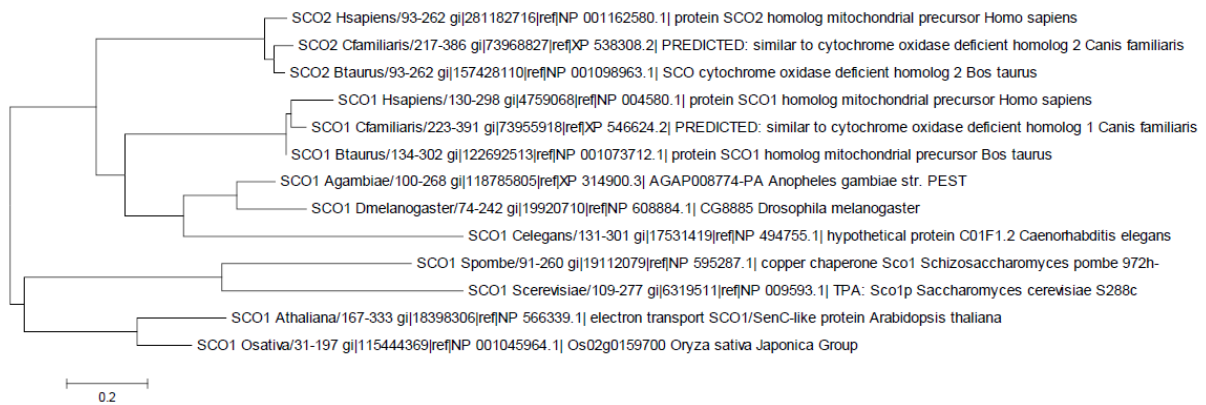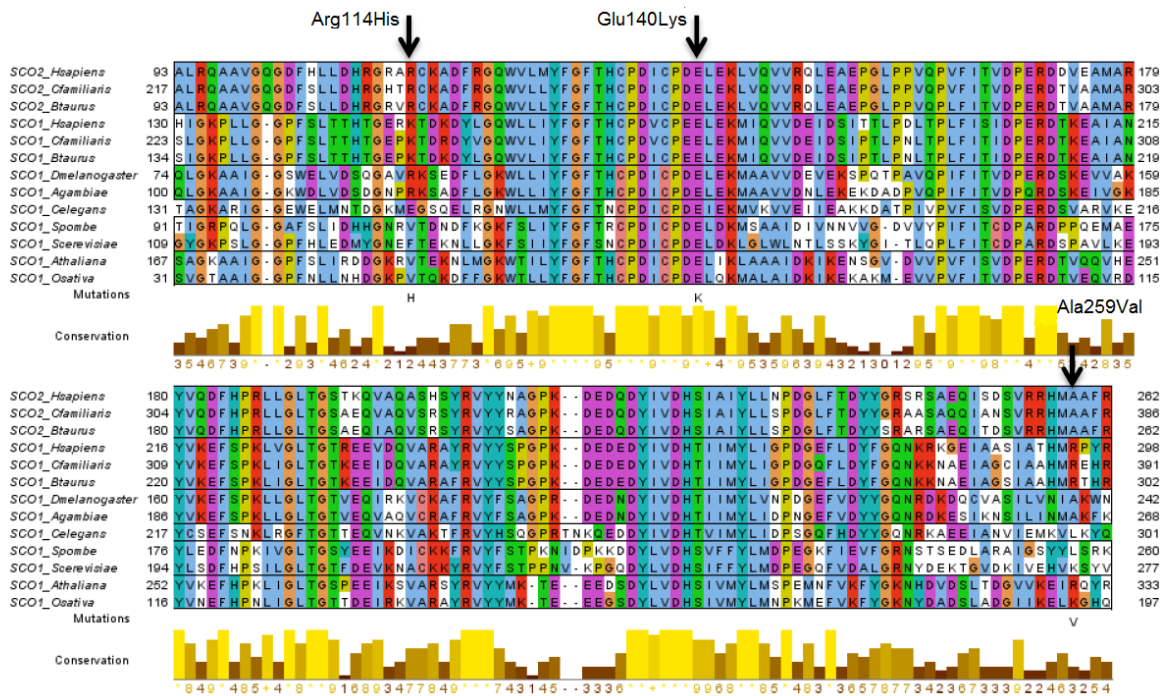

## Supplement 6. Methods of Myopic Mouse Modeling

Detailed methodology of myopic mouse modeling for immunohistochemistry. Animals used in the experiment was IRB approved.

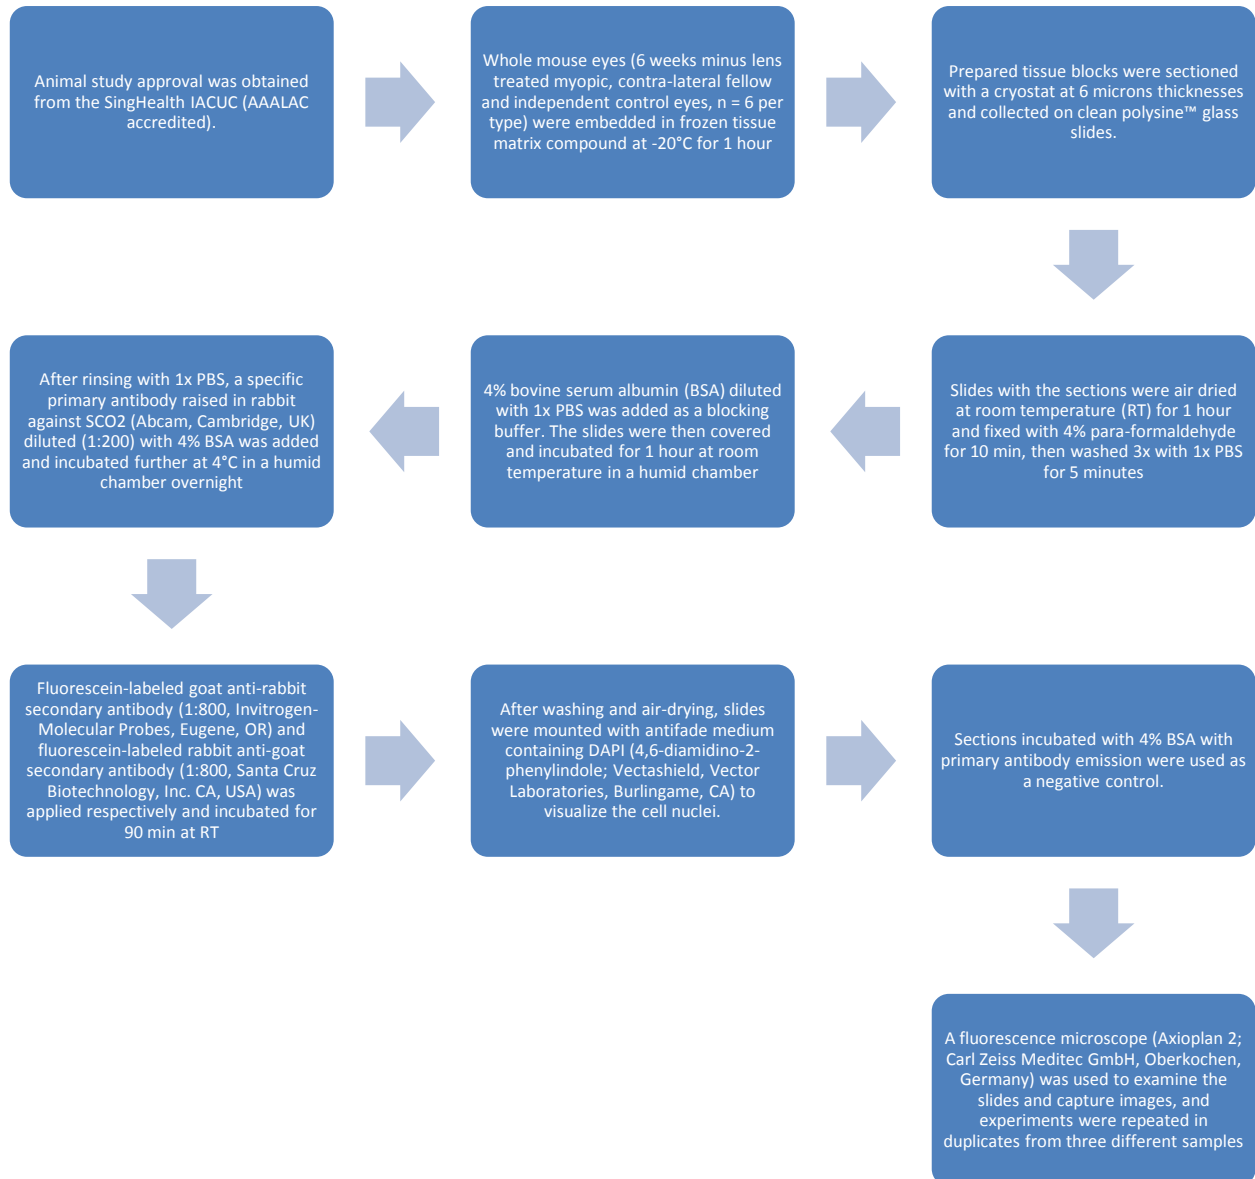



### Supplement 7. cDNA Gene Expression

cDNA expression of *SCO2* and *GAPDH* on all available tissues. The *SCO2* primers used were F- gcttcctctcgtgcttggtc and R- CTTGACAAAAGCCAGGACCTC (177b bp). The *GAPDH* primers used were F- tcaccaggctgctttaac and R- gacaagctcccgttctcag (150bp).

**Adult cDNA** 1. Brain 2. Heart 3. Liver 4. Skeletal Muscle 5. Kidney 6. Lung 7. Placenta 8. Pancreas 9. Control cDNA --- **Fetal cDNA** 10. brain 11. Heart 12. Liver 13. Skeletal Muscle 14. Kidney 15. Lung 16. Thymus 17. Spleen 18. Control cDNA 19. Adult Retina 20. Adult RPE 21. Adult Choroid 22. Adult Sclera 23. 24 week Retina/RPE 24. 24 week Choroid 25. 24 week Sclera 26. NTC

**Adult cDNA** 27. Brain 28. Heart 29. Liver 30. Skeletal Muscle 31. Kidney 32. Lung 33. Placenta 34. Pancreas 35. Control cDNA --- **Fetal cDNA** 36. brain 37. Heart 38. Liver 39. Skeletal Muscle 40. Kidney 41. Lung 42. Thymus 43. Spleen 44. Control 45. Adult Retina 46. Adult RPE 47. Adult Choroid 48. Adult Sclera 49. 24 week Retina/RPE 50. 24 week Choroid 51. 24 week Sclera 52. NTC

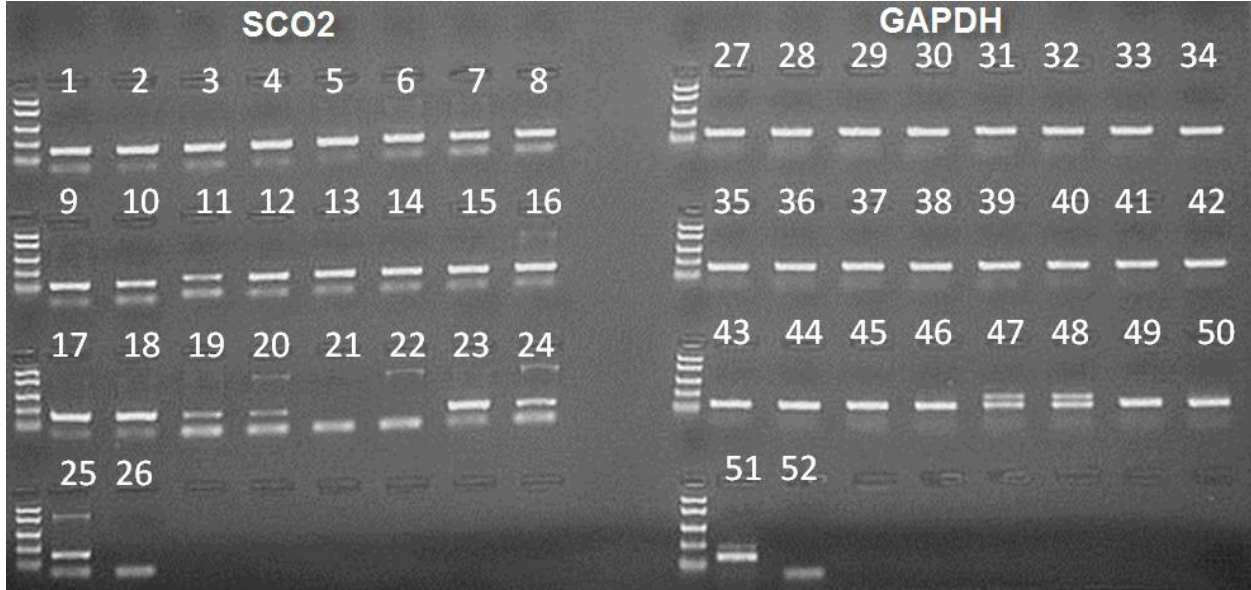

Supplement: mmc1.pdf [file mmc1.pdf]
